# Supplementary material for: A near-infrared superoxide generator based on a biocompatible indene-bearing heptamethine cyanine dye
Source: Royal Society of Chemistry journal article supplement (doi:10.1039/d4tb01663g), 2024-01-01
Supplement: d4tb01663g1.pdf [file d4tb01663g1.pdf]

## ***Supporting Information for***

# **Near-infrared superoxide generator based on a biocompatible indene-bearing heptamethine cyanine dye**

Nikita Bel'ko, Anna Mal'tanova, Anastasiya Bahdanava, Anatol Lugovski, Sviatlana Fatykhava, Polina Shabunya, Adam Smaliakou, Sergey Poznyak, Tatsiana Kulahava, Michael Samtsov

---

### Contents

|                                                                             |   |
|-----------------------------------------------------------------------------|---|
| S1 Experimental .....                                                       | 2 |
| S1.1 Superoxide detection with Mito-HE.....                                 | 2 |
| S1.2 The demonstration of oxidative stress in vitro .....                   | 2 |
| S2 The measurement of the photodegradation quantum yields.....              | 3 |
| S3 Mass spectrometry data.....                                              | 4 |
| S4 Absorption and fluorescence spectra for dye 1 inside Vero E6 cells ..... | 4 |

## S1 Experimental

### S1.1 Superoxide detection with Mito-HE

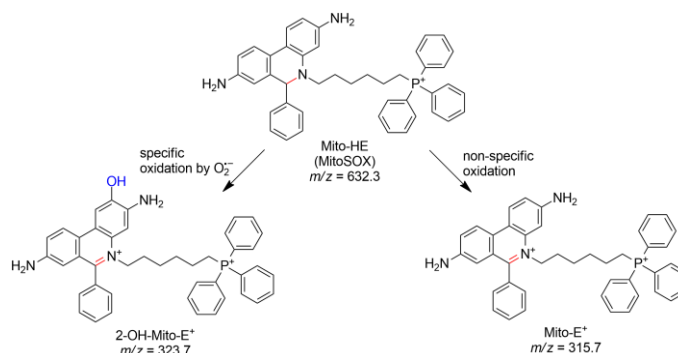

**Fig. S1.** The oxidation mechanism of Mito-HE.

### S1.2 The demonstration of oxidative stress in vitro

Photoinduced processes in cells loaded with dye **1** were studied with H<sub>2</sub>DCF as a fluorogenic probe (Fig. S2). Cells were incubated with the probe in the form of H<sub>2</sub>DCF-DA that readily crosses cytoplasmic membrane. After passing to the cytoplasm, H<sub>2</sub>DCF-DA is cleaved by esterases yielding H<sub>2</sub>DCF. Non-fluorescent H<sub>2</sub>DCF can be oxidized to fluorescent DCF under certain conditions. In particular, Fenton-type reactions between H<sub>2</sub>O<sub>2</sub> and redox-active metal ions (primarily Fe<sup>2+</sup>) result in the production of •OH that efficiently oxidizes H<sub>2</sub>DCF to DCF. Alternatively, H<sub>2</sub>DCF can be oxidized by cytochrome c. Redox-active metal ions and cytochrome c are mostly located within lysosomes and mitochondria, respectively. Since hydrophilic H<sub>2</sub>DCF cannot cross membranes, cytosolic DCF-induced fluorescence can be observed only after the release of redox-active metal ions from lysosomes and/or cytochrome c from mitochondria<sup>1</sup>. These processes are a result of lysosomal and mitochondrial membrane permeabilization and can be linked to different forms of stress and cell death<sup>2</sup>.

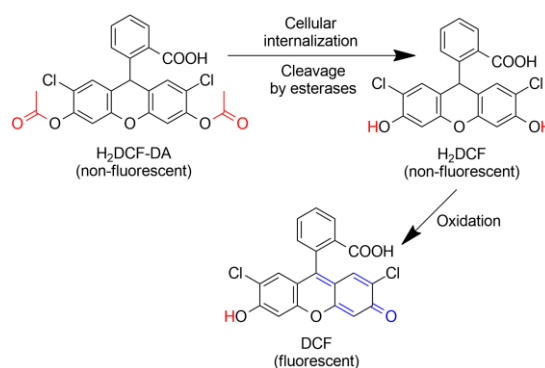

**Fig. S2.** The transformations of H<sub>2</sub>DCF-DA upon cellular uptake and oxidation.

<sup>1</sup> **a.** Karlsson, M.; Kurz, T.; Brunk, U. T.; Nilsson, S. E.; Frennesson, C. I. What does the commonly used DCF test for oxidative stress really show? *Biochem. J.* **2010**, 428, 183–190; **b.** Wardman, P. Use of the dichlorofluorescein assay to measure “reactive oxygen species”. *Radiat. Res.* **2008**, 170, 406–407.

<sup>2</sup> **a.** Wang, F.; Gómez-Sintes, R.; Boya, P. Lysosomal membrane permeabilization and cell death. *Traffic* **2018**, 19, 918–931; **b.** Kroemer, G.; Galluzzi, L.; Brenner, K. Mitochondrial membrane permeabilization in cell death. *Physiol. Rev.* **2007**, 87, 99–163.

## S2 The measurement of the photodegradation quantum yields

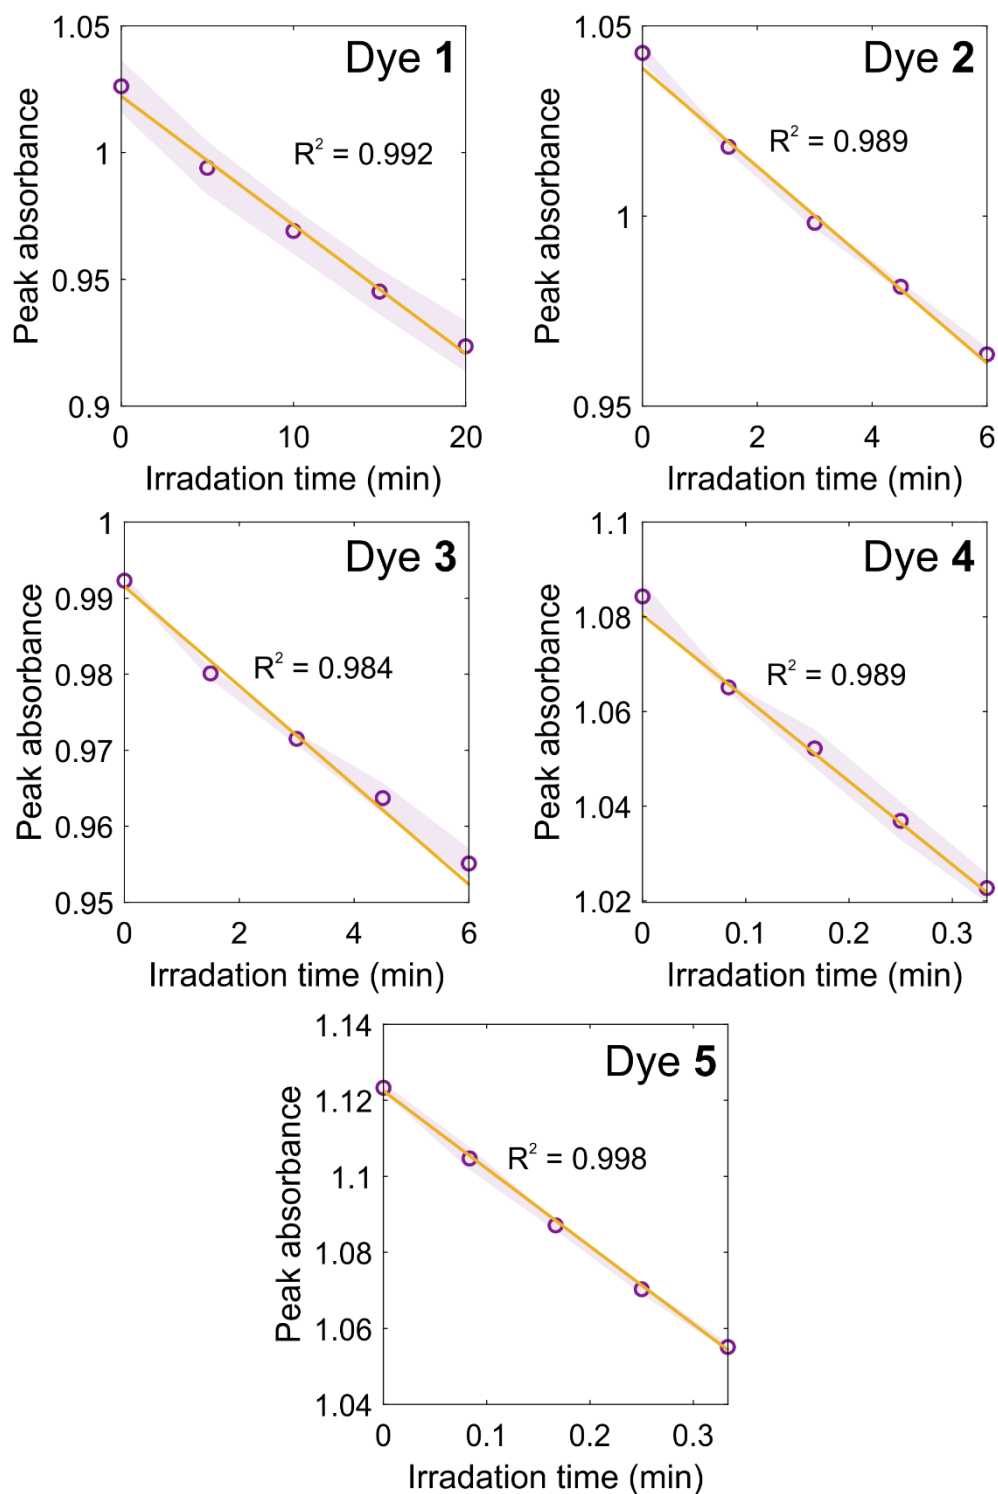

**Fig. S3.** Absorbance in the peak of the absorption spectrum as a function of irradiation time for 5  $\mu\text{M}$  solutions of dyes 1–5 in MeCN/H<sub>2</sub>O ( $v/v = 1:1$ ). The samples were exposed to 750 nm laser radiation with an irradiance of 130  $\text{mW cm}^{-2}$ . The measurements for each dye were repeated four times.

### S3 Mass spectrometry data

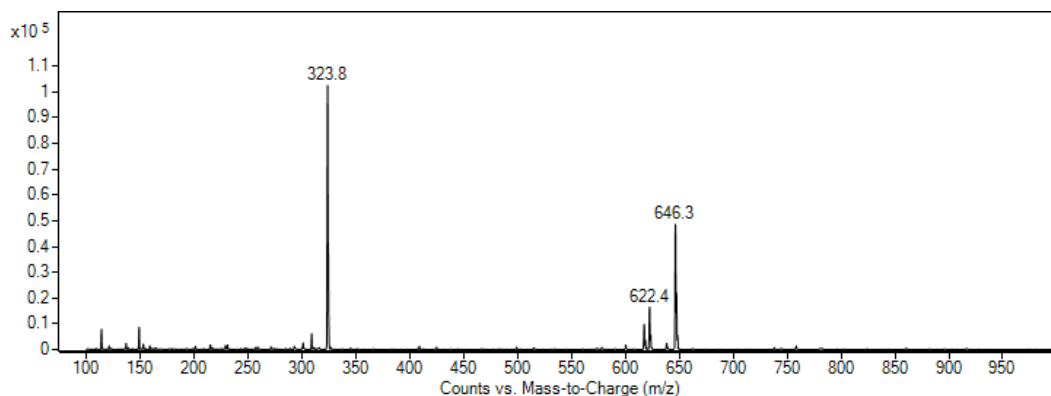

**Fig. S4.** Mass spectrum for 2-OH-Mito- $E^+$  ( $m/z$  calculated 323.7, found 323.8) photogenerated in a 5  $\mu\text{M}$  solution of dye **1** in the presence of 5  $\mu\text{M}$  Mito-HE in phosphate-buffered saline (pH 7.0, 50 mM) under 750 nm irradiation for 4 min ( $130 \text{ mW cm}^{-2}$  irradiance,  $31 \text{ mW cm}^{-2}$  light dose). Mass spectrometry was performed after HPLC separation as described in the main text (Section 2.5). The presented mass spectrum corresponds to a retention time of 3.35 min in HPLC. The additional peaks in the spectrum can be assigned to the photooxidation products of dye **1** and impurities from the HPLC column.

### S4 Absorption and fluorescence spectra for dye 1 inside Vero E6 cells

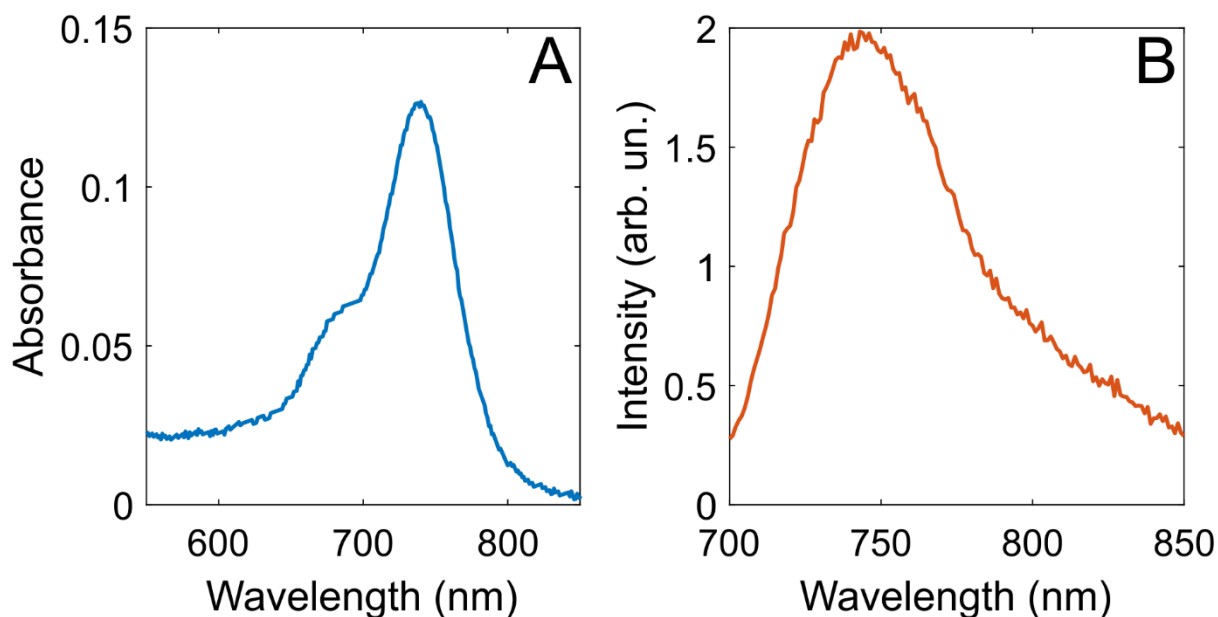

**Fig. S5.** The absorption spectrum (A) and fluorescence spectrum excited at 650 nm (B) for Vero E6 cells incubated with 10  $\mu\text{M}$  dye **1** for 30 min, washed, and resuspended in HEPES buffer. This excitation wavelength was chosen to minimize the impact of excitation light scattering on the shape of the fluorescence spectrum.
